# Supplementary material for: High-resolution mapping of centromeric protein association using APEX-chromatin fibers
Source: PubMed Central journal article supplement (PMC6238281; doi:10.1186/s13072-018-0237-6), 2018-11-16
Supplement: 13072_2018_237_MOESM1_ESM.pdf [file 13072_2018_237_MOESM1_ESM.pdf]

A

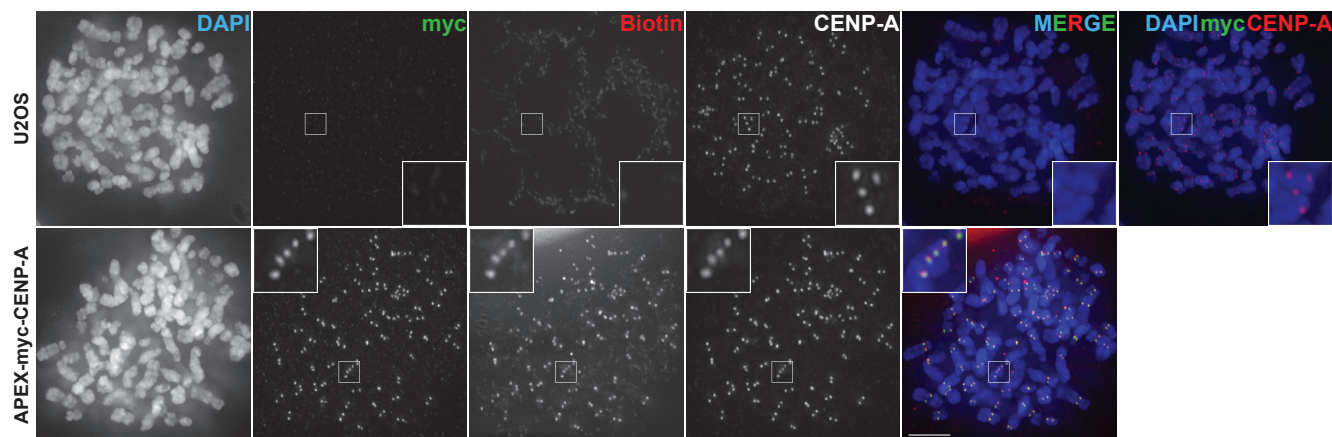

B

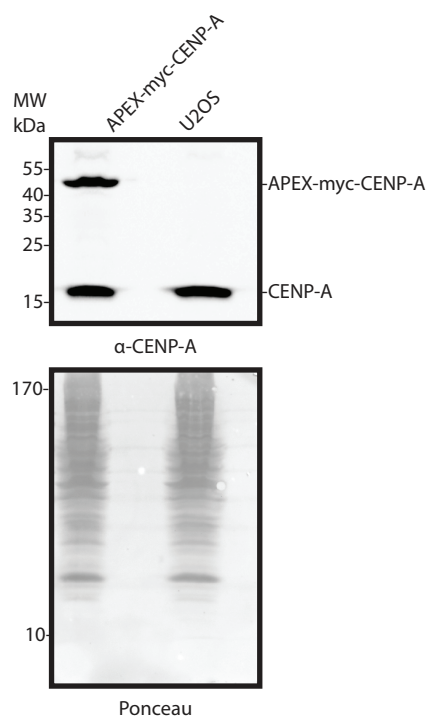

C

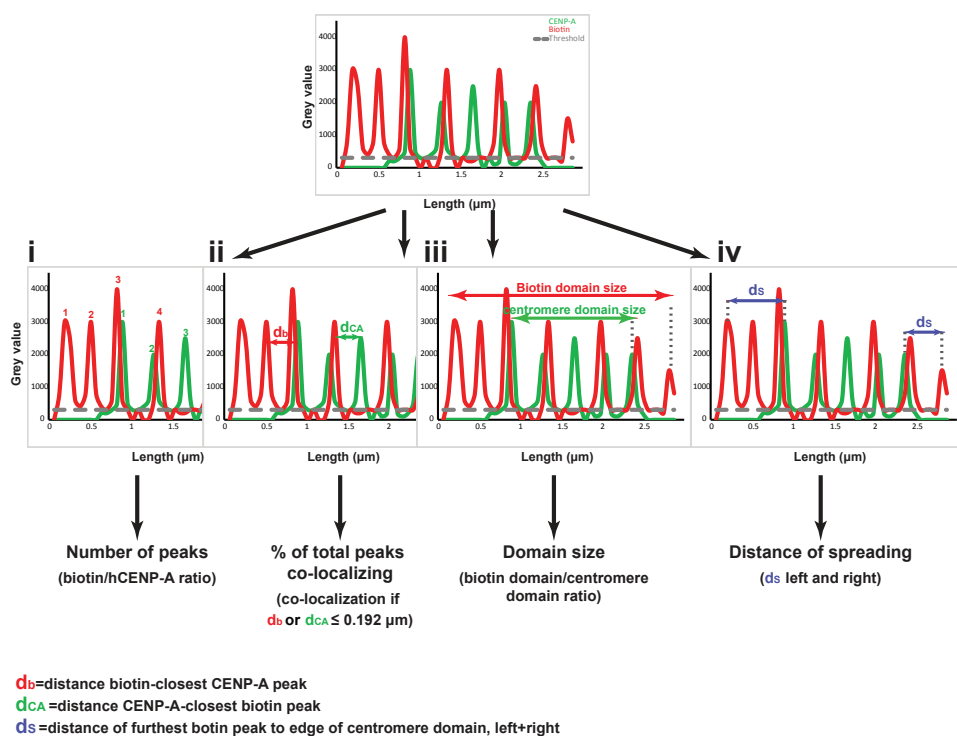

D

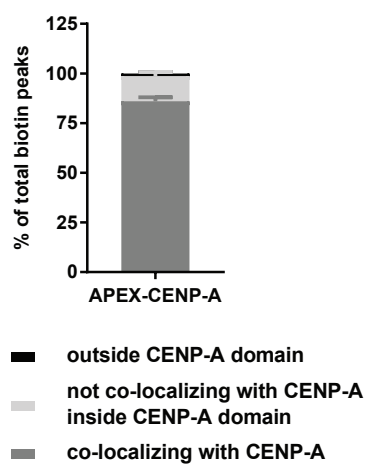

Figure S1

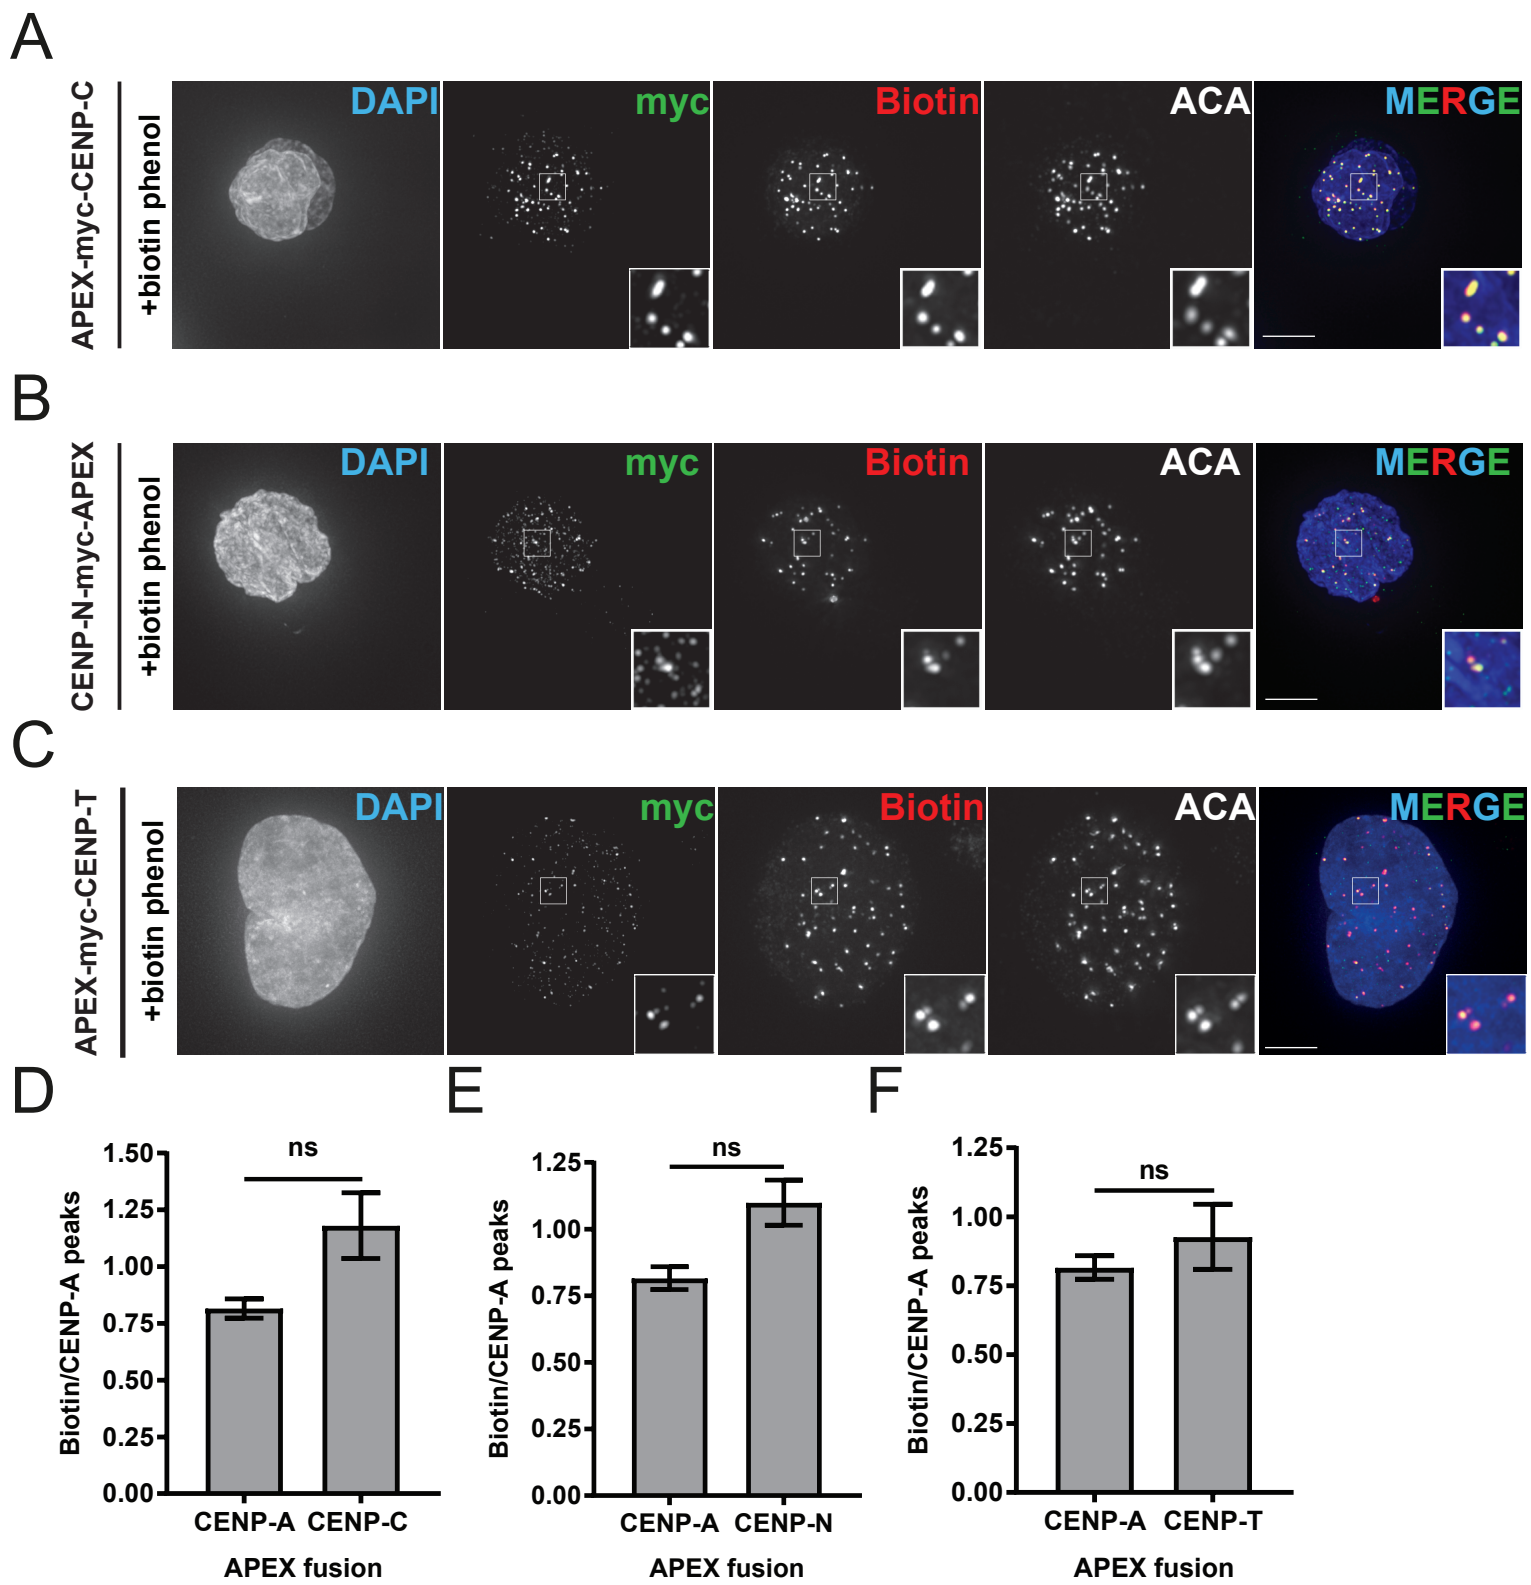

Figure S2

**A**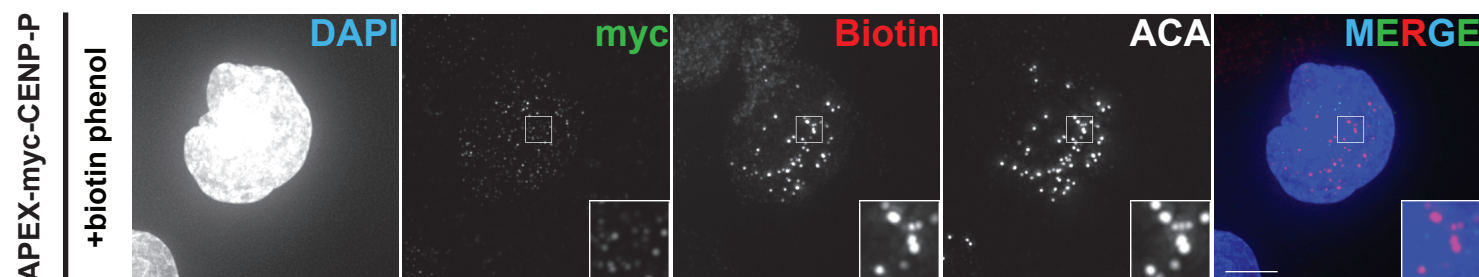**B**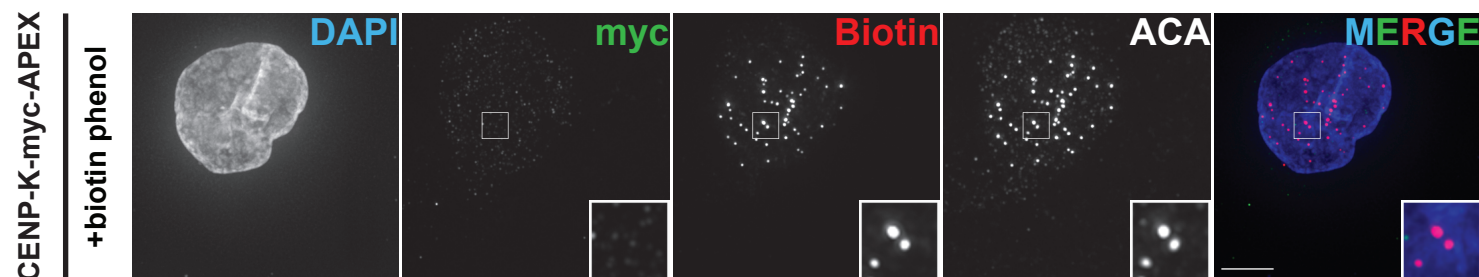**C**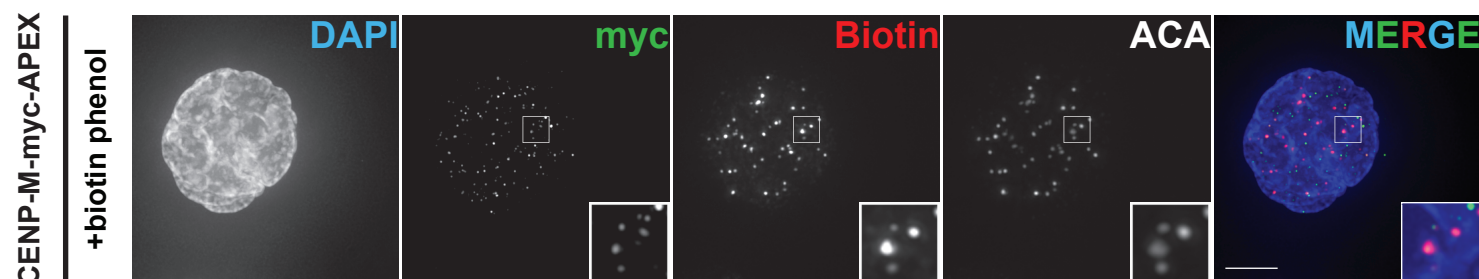**D**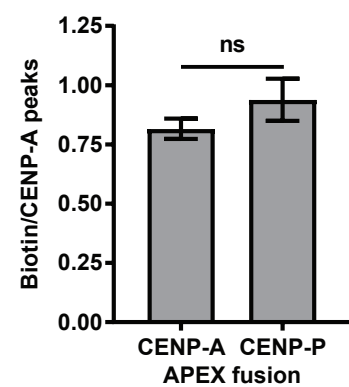**E**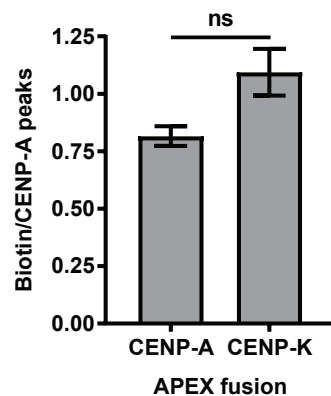**F**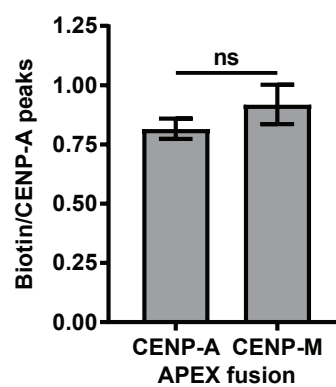

Figure S3

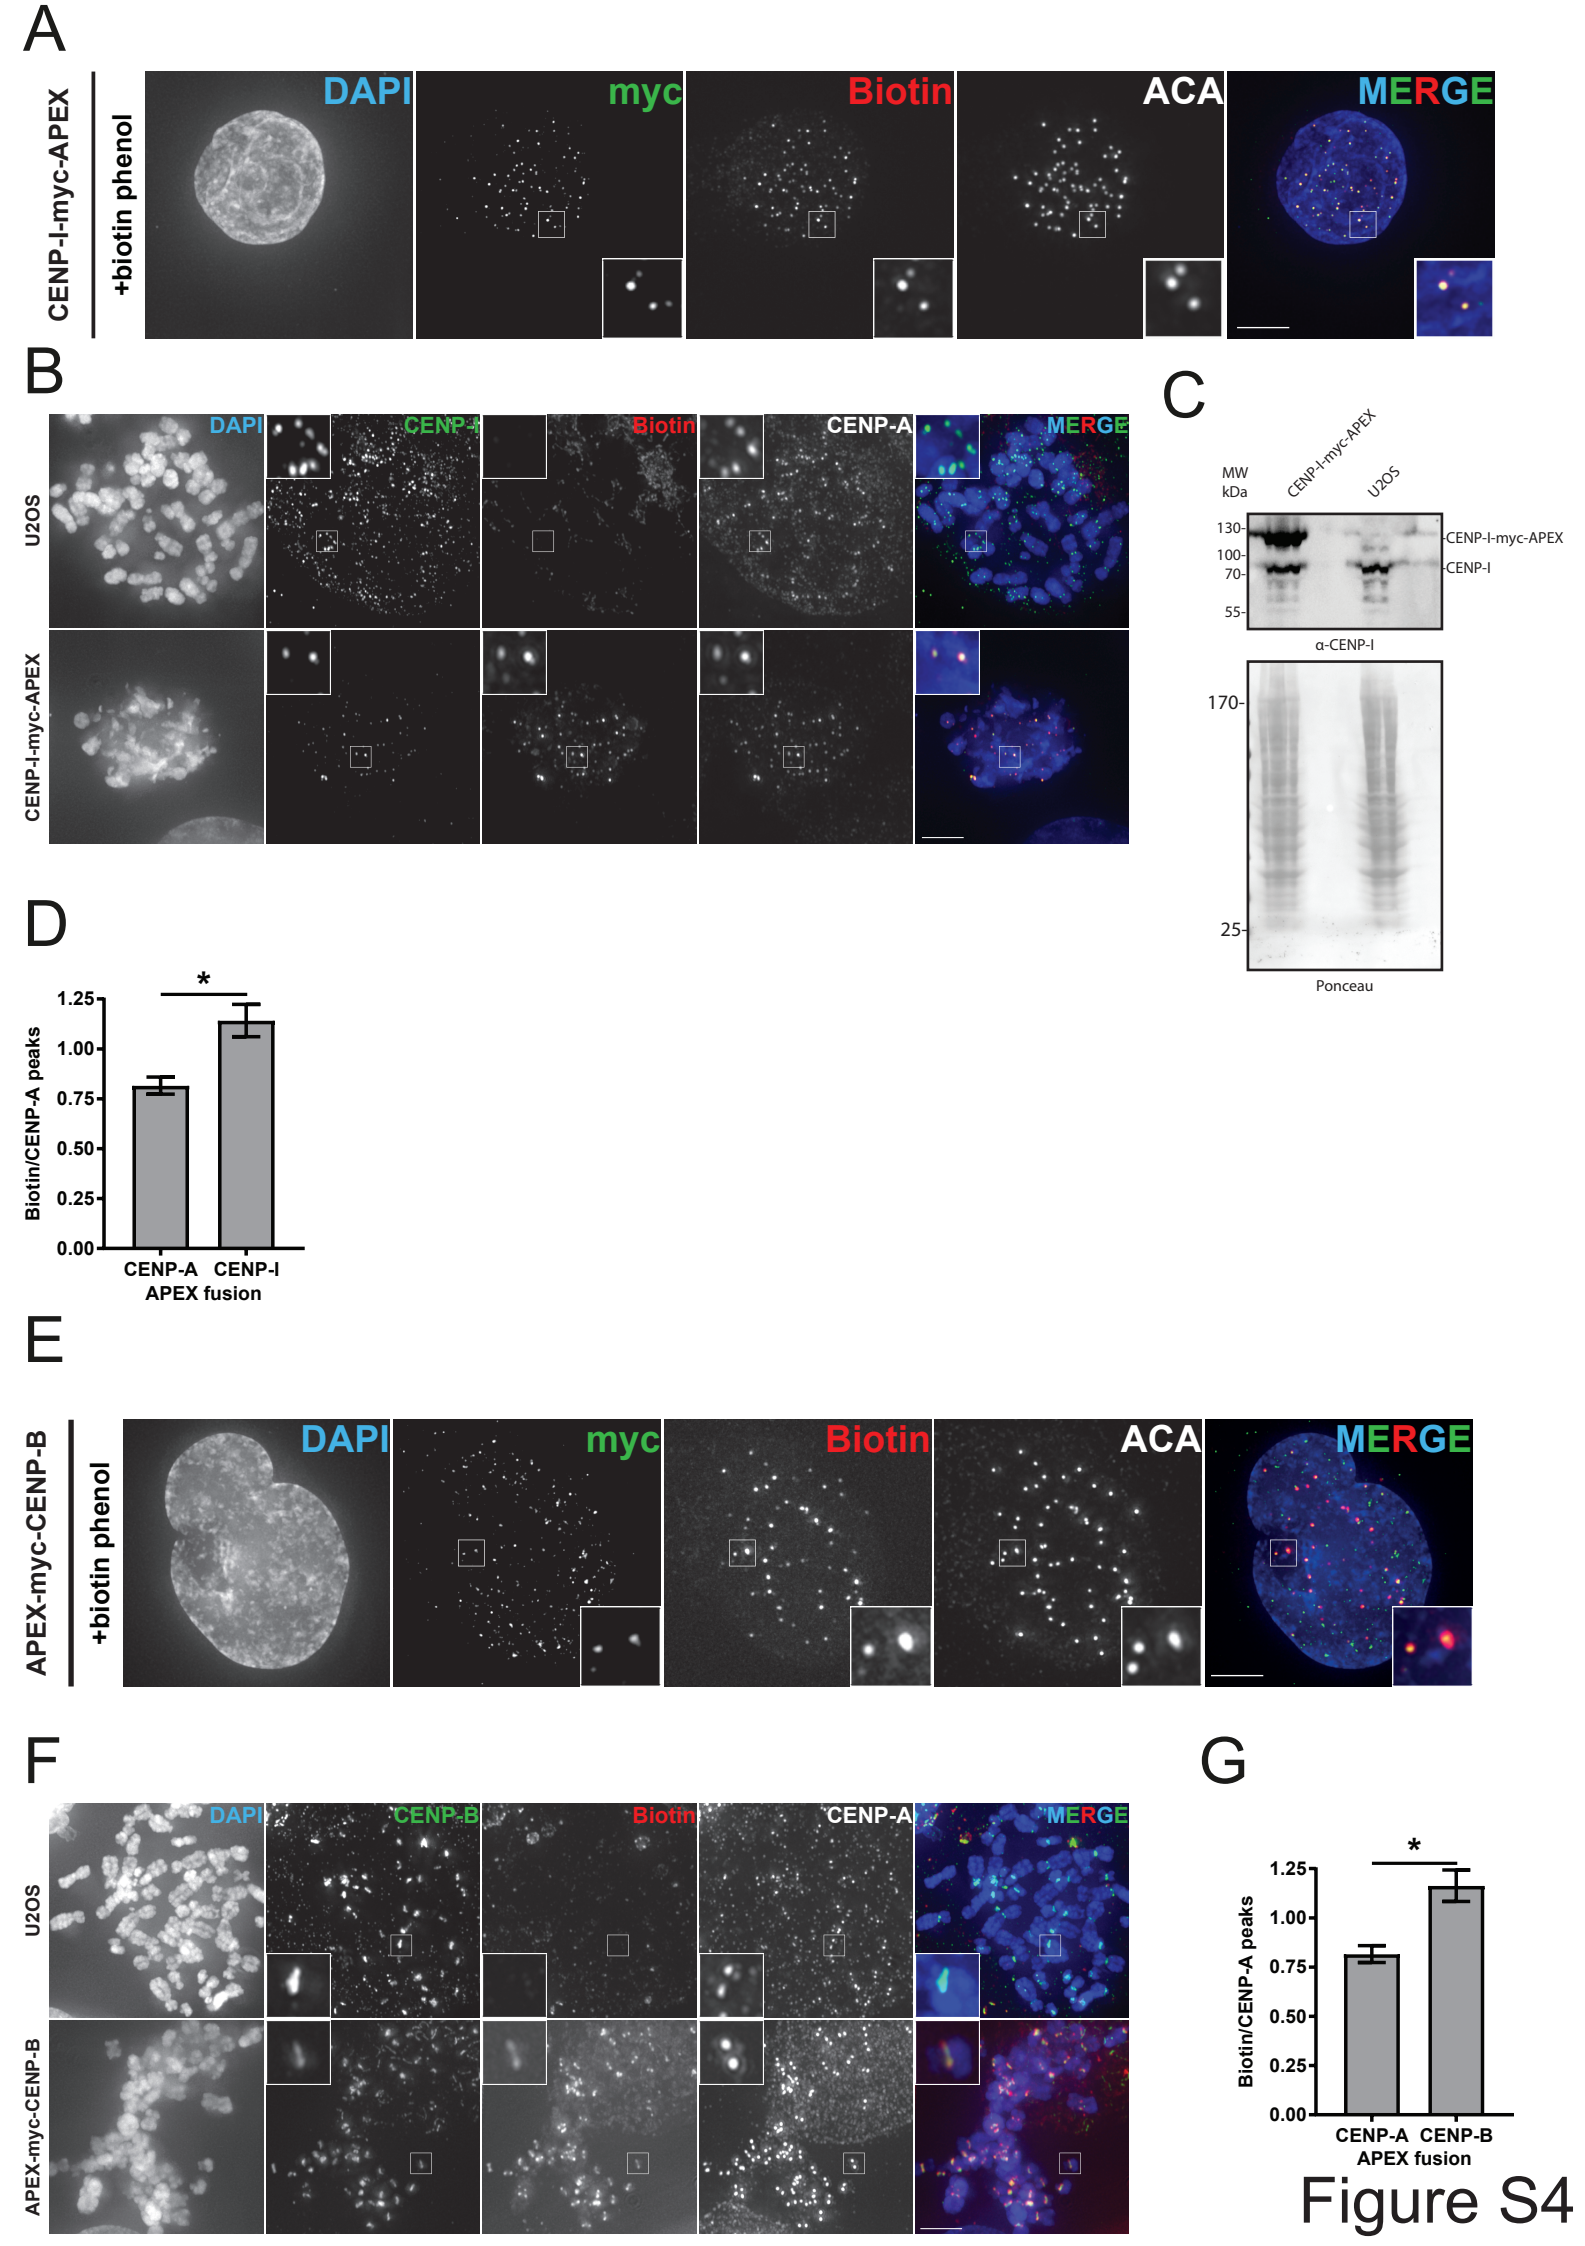

Figure S4

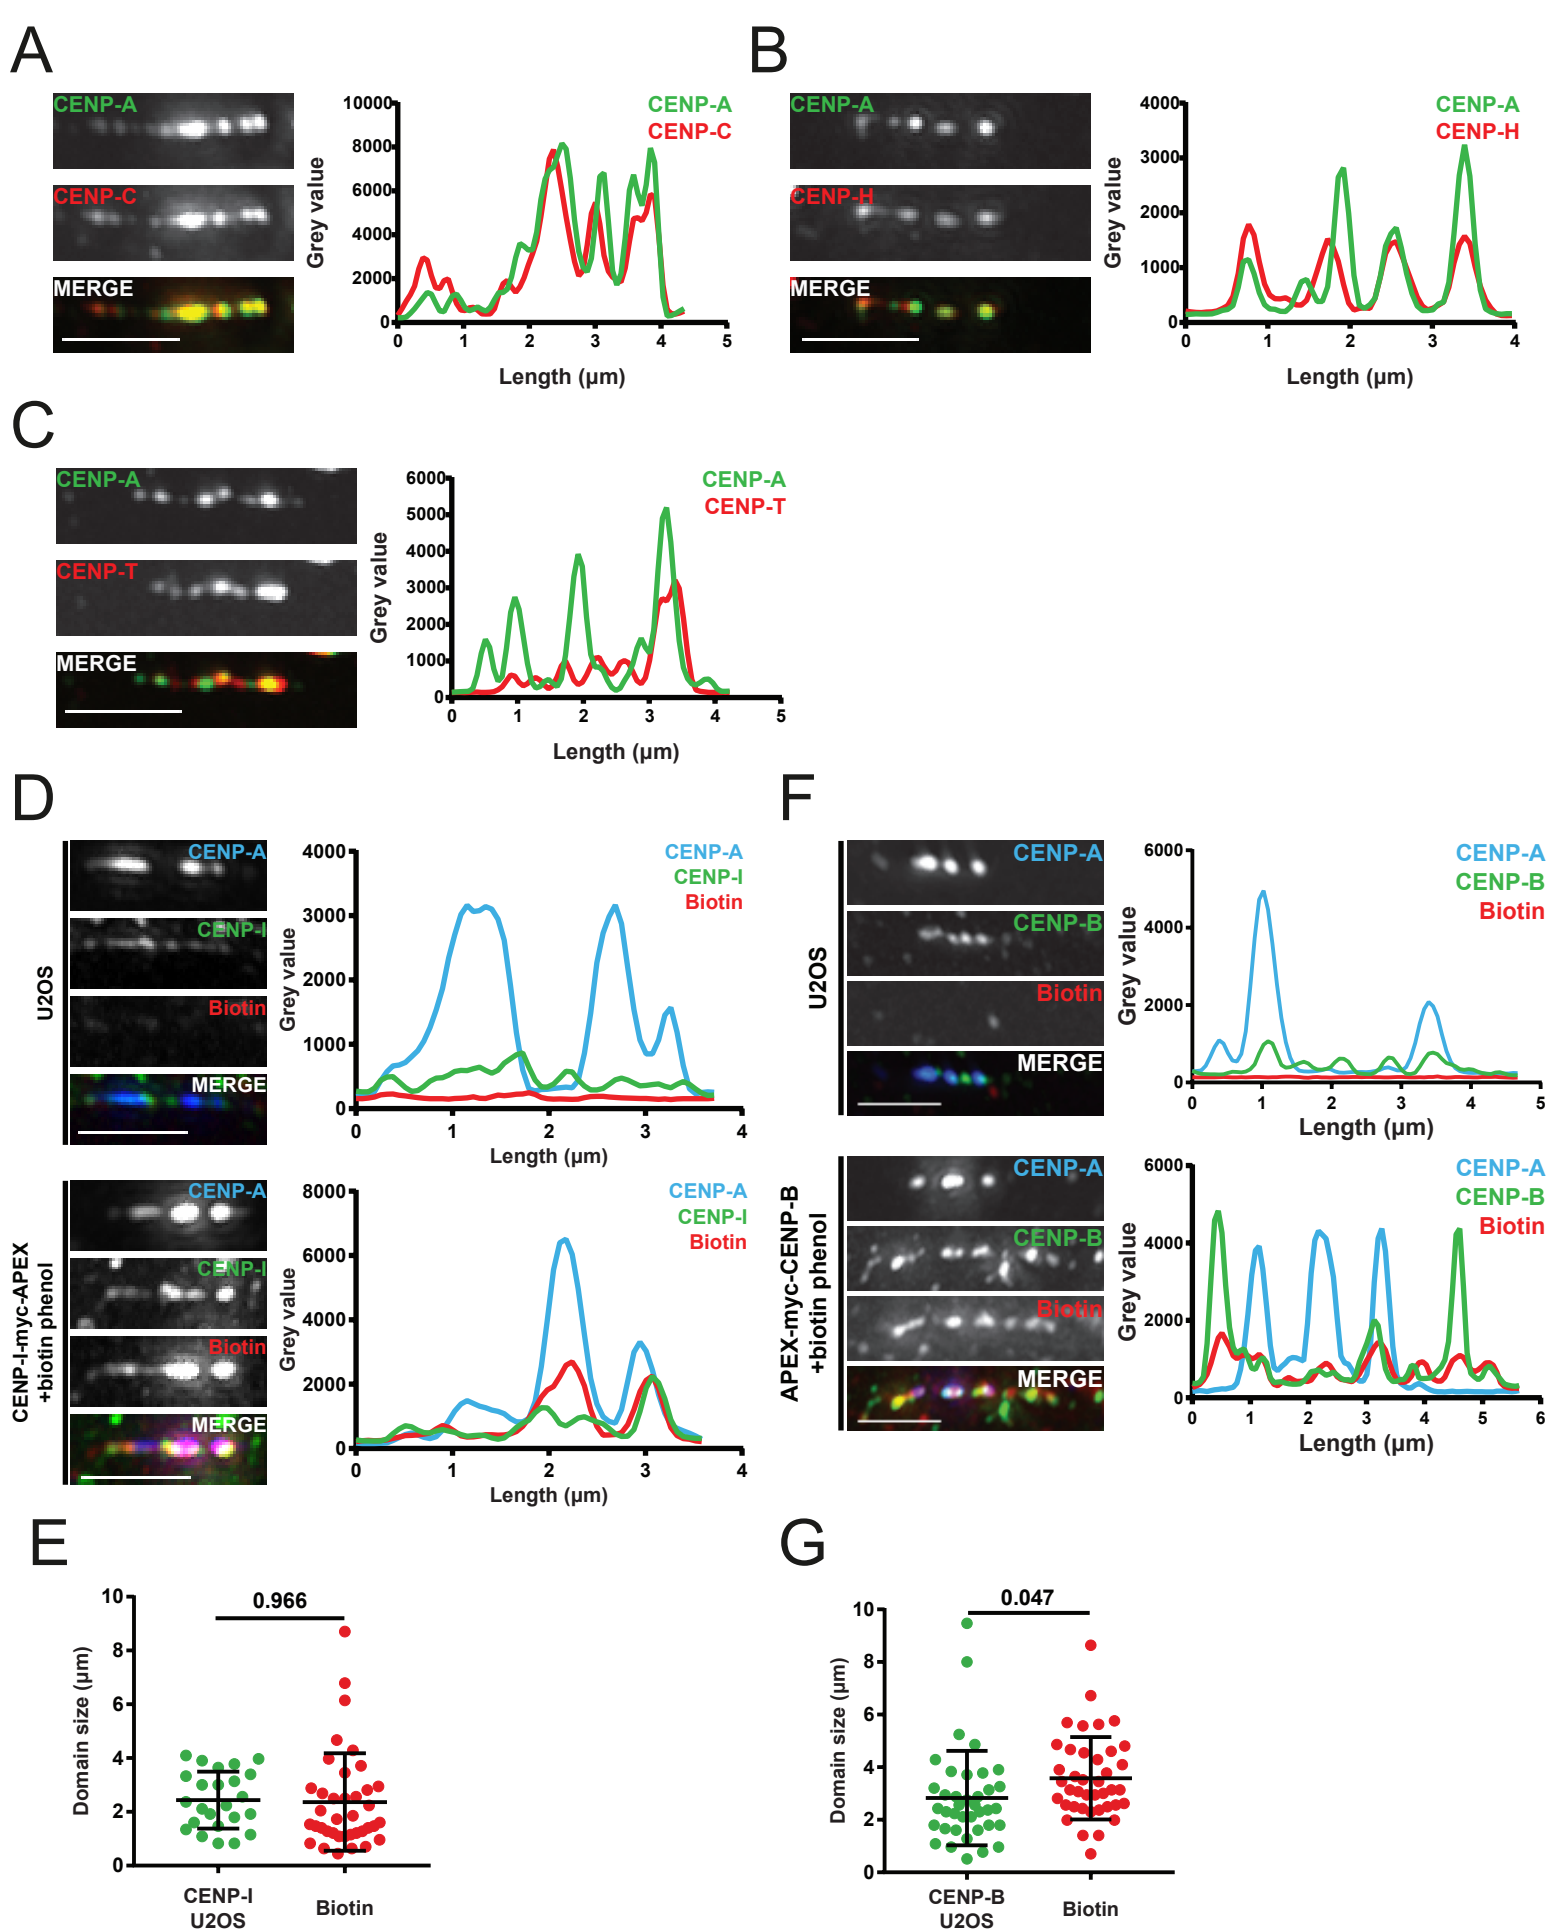

Figure S5
